# Supplementary material
Source: publisher figshare collection journal article supplement (https://acs.figshare.com/ndownloader/files/17515586)
Supplement: Supplementary file 1 [file 17515586]

**Supporting Information for**

# **Realization of Superhydrophobic Surface for the Detection of Residual Detergent Concentration**

Eunbin Cho,<sup>†</sup> Gitae Namgung,<sup>†</sup> Chulkyoon Mok,<sup>‡</sup> and Jin-Seo Noh<sup>\*,†</sup>

*<sup>†</sup>Department of Nano-Physics, Gachon University, 1342 Seongnamdaero, Sujeong-gu,  
Seongnam-si, Gyeonggi-do 13120, Korea*

*<sup>‡</sup>Department of Food Science and Biotechnology, Gachon University, 1342 Seongnamdaero,  
Sujeong-gu, Seongnam-si, Gyeonggi-do 13120, Korea*

\*Author to whom correspondence should be addressed: Jin-Seo Noh:

e-mail: jinseonoh@gachon.ac.kr,

phone: +82 317505611

Number of pages: 9

Number of figures: 8

Number of tables: 0

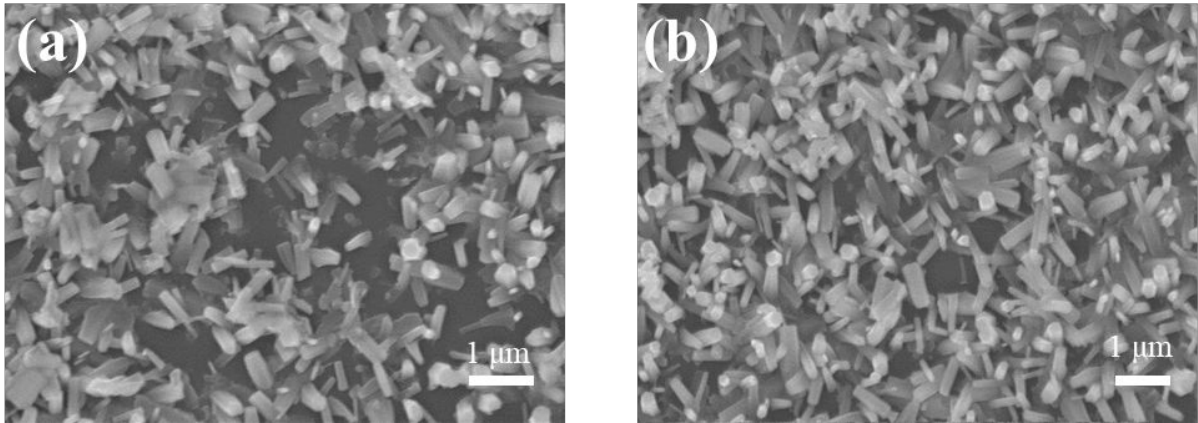

**Figure S1.** SEM images of ZnO Nanorods grown on the glass substrate without seed layer formation. The two images were obtained from different locations on the same sample.

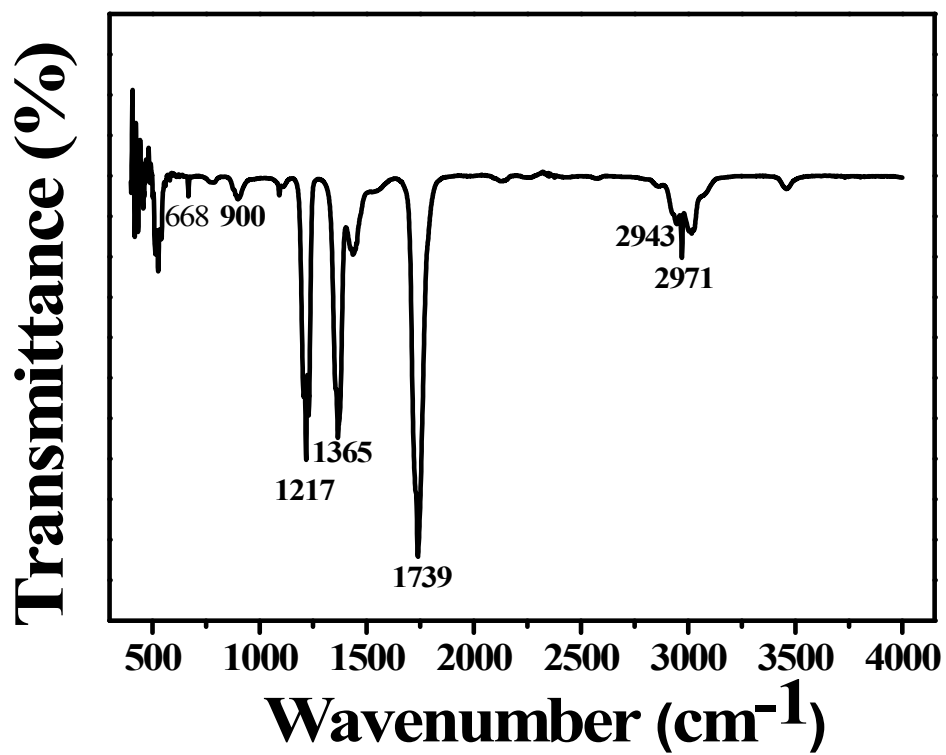

**Figure S2.** FT-IR spectrum of pure stearic acid solution.

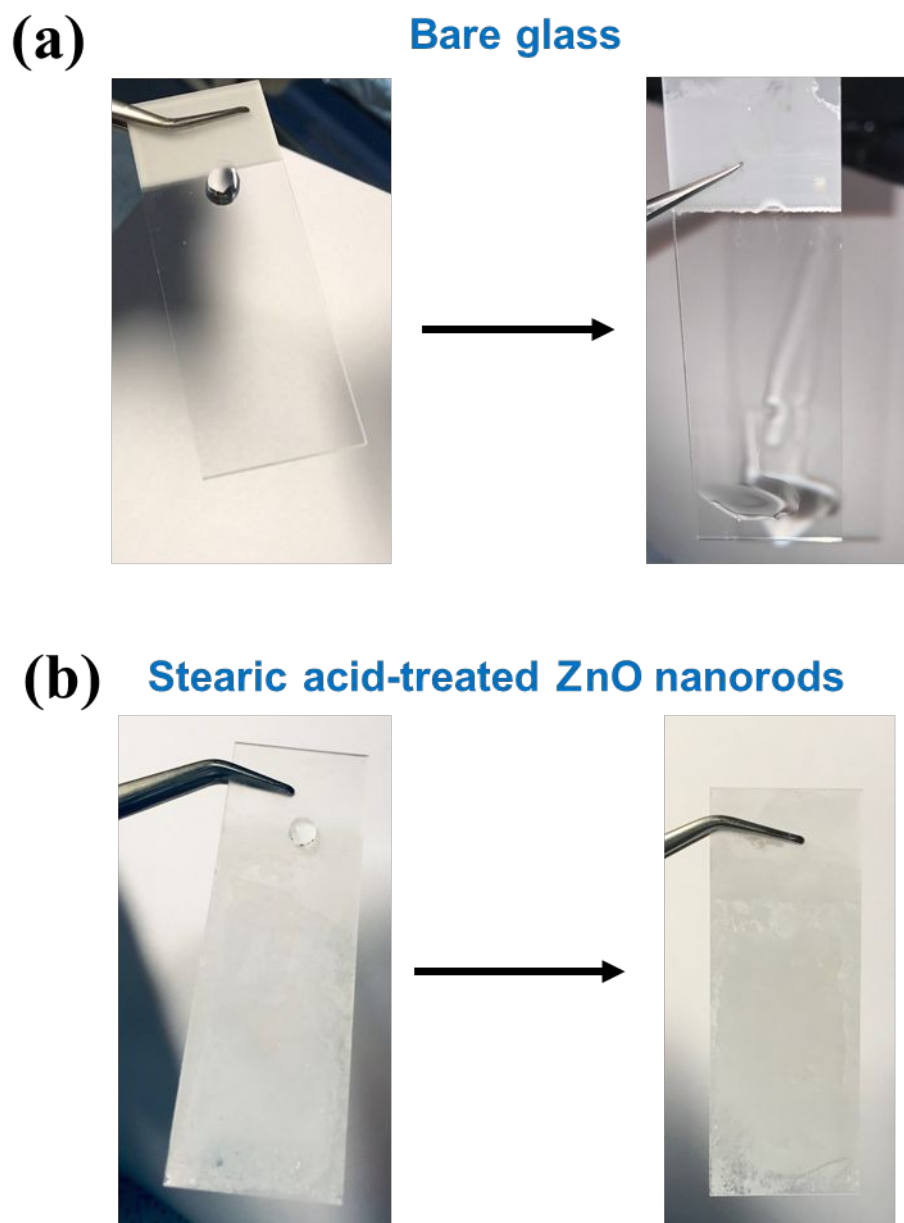

**Figure S3.** Images of water drops (a) on the bare glass and (b) on the surface-modified glass using stearic acid-treated ZnO nanorods. At a tilted angle, water drop on the bare glass spreads over the large area, whereas it rapidly rolls off the surface-modified glass without spreading.

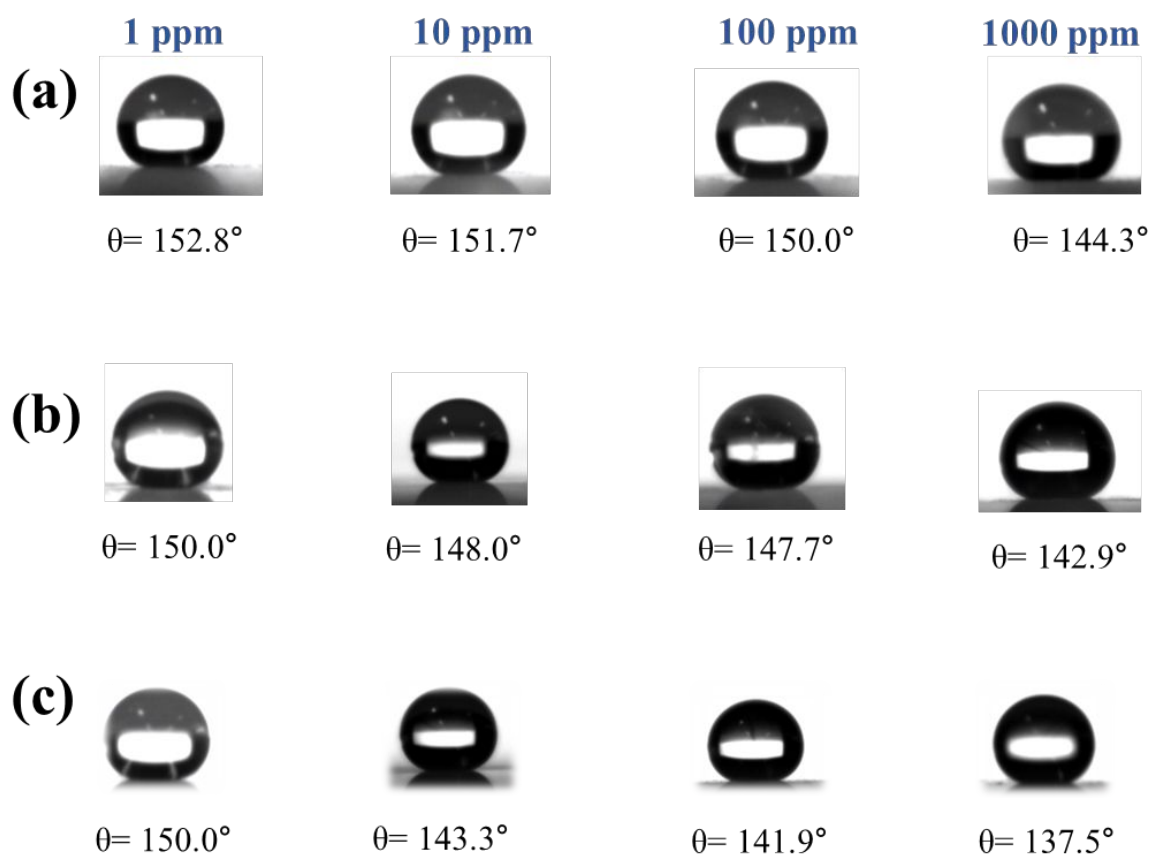

**Figure S4.** Images and average contact angles of detergent solutions on the surface-modified glass: (a) rinse aid dishwasher, (b) sodium detergent, and (c) potassium detergent. The contact angles were measured as a function of detergent concentration.

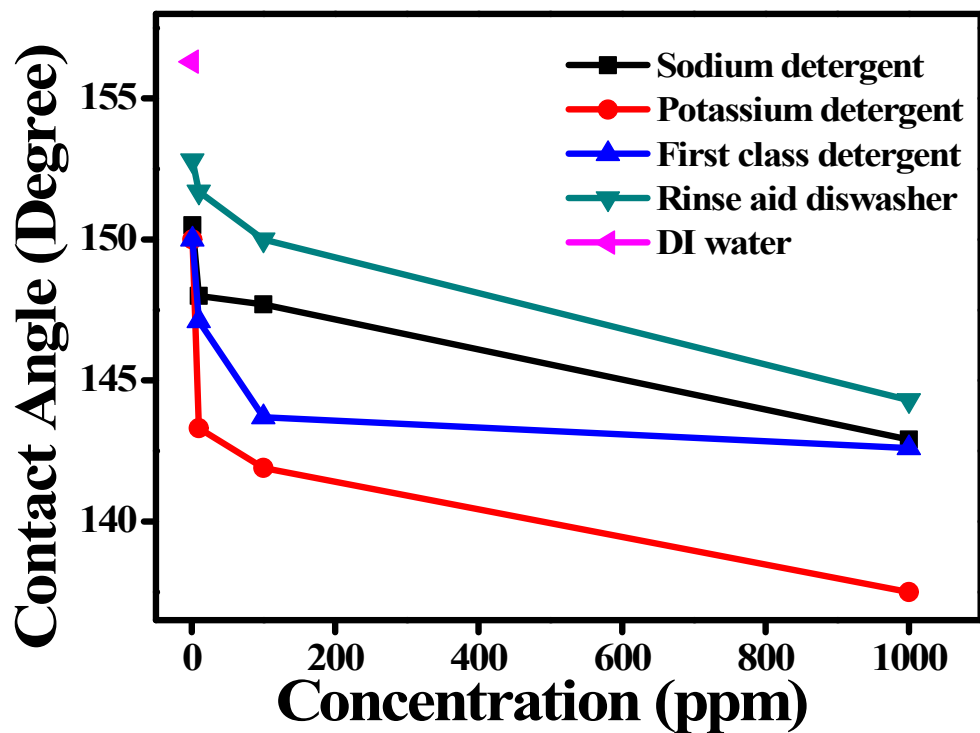

**Figure S5.** Contact angle versus detergent concentration curves for different types of detergents.

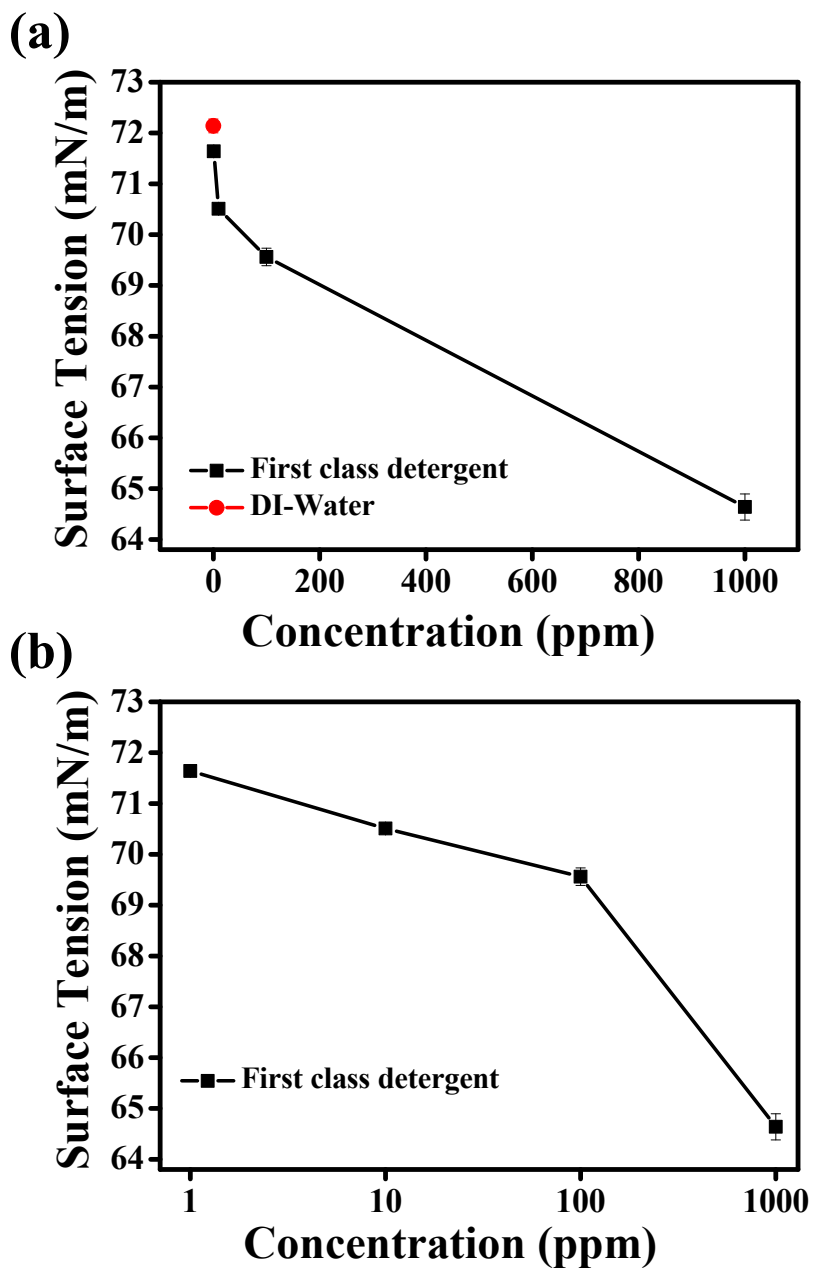

**Figure S6.** (a) Surface tension versus concentration curve for DI water and first class detergent solutions. (b) Semi-log plot between the surface tensions and detergent concentrations for the first class detergent solutions.

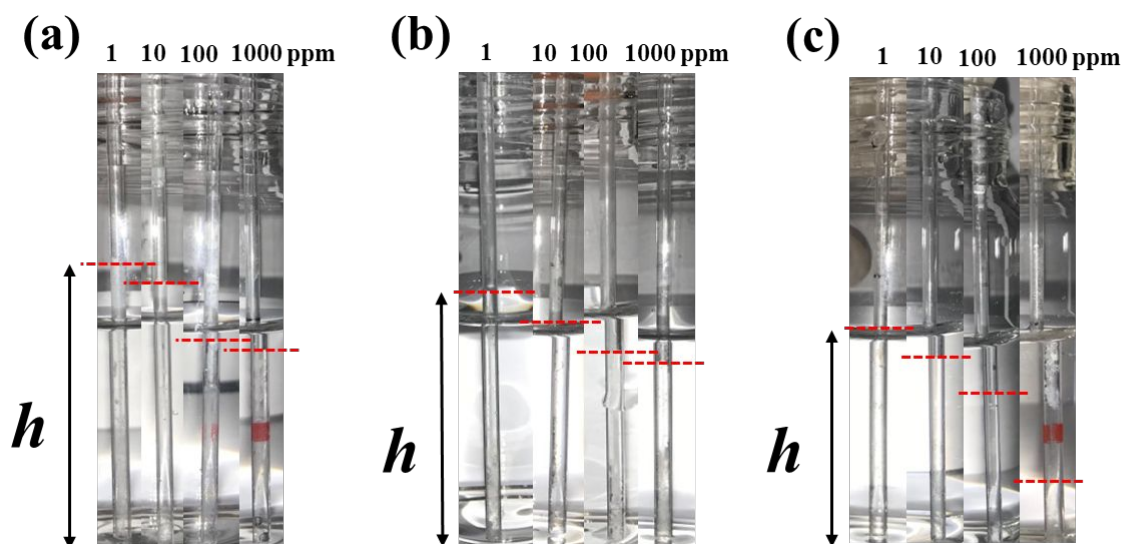

**Figure S7.** Detergent concentration-dependent capillary heights for different detergent solutions: (a) rinse aid dishwasher, (b) sodium detergent, and (c) potassium detergent.



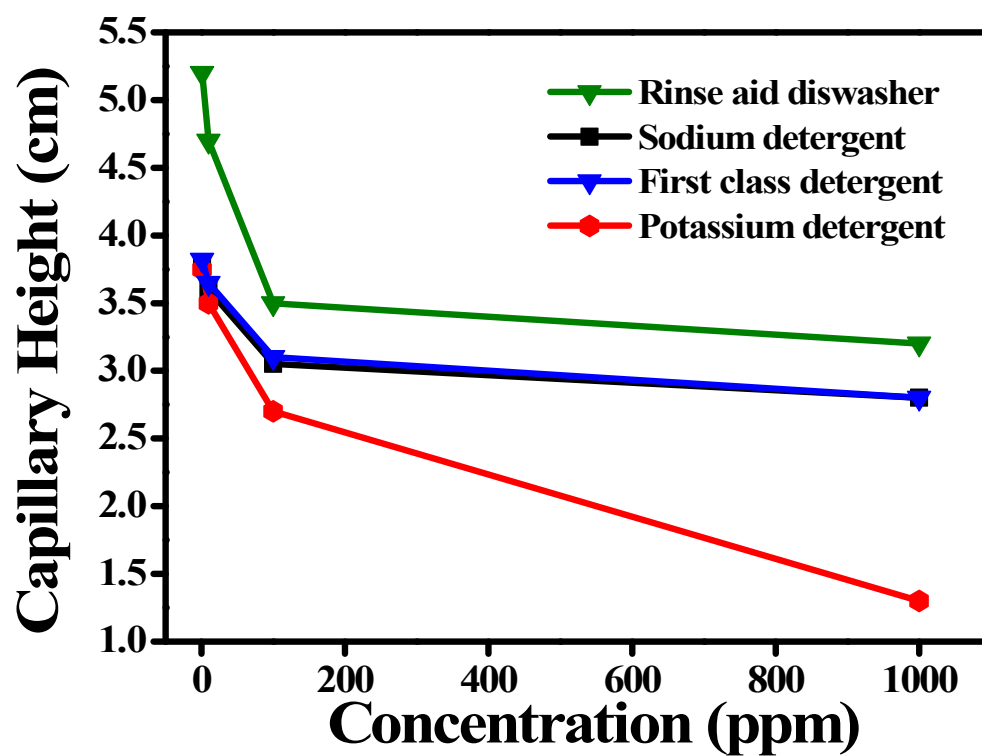

**Figure S8.** Capillary height versus detergent concentration curves for different types of detergents.
